# Supplementary material for: Clinical outcomes of KeraVio using violet light: emitting glasses and riboflavin drops for corneal ectasia: a pilot study
Source: PubMed Central journal article supplement — Br J Ophthalmol. 2020 Sep 7;105(10):1376–82. doi: 10.1136/bjophthalmol-2020-316974 (PMC8479745; doi:10.1136/bjophthalmol-2020-316974), 2020-09-07
Supplement: bjophthalmol-2020-316974supp001.pdf [file bjophthalmol-2020-316974supp001.pdf]

**Supplemental Table****Supplemental Table 1. Specification of TLG-003**

|                                                |                                                                                                                                                                                        |
|------------------------------------------------|----------------------------------------------------------------------------------------------------------------------------------------------------------------------------------------|
| Methods                                        | Wavelength of violet light (VL): peak 375 nm, range 360 to 400 nm. VL LEDs on the glass flame radiates toward to each cornea.<br>Angle of irradiation of VL against eye is 53 degrees. |
| Illuminance                                    | 310 $\mu\text{W}/\text{cm}^2$ at cornea                                                                                                                                                |
| Irradiation time                               | 3.0 hours daily<br>Lights on and off are manually controlled.                                                                                                                          |
| Electronic circuit                             | Charging, power switch, temperature monitoring and backup circuit are included.                                                                                                        |
| Electronic power                               | Lithium Ion Battery<br>Voltage: 3.7 V<br>Capacity: 200 mAh<br>Provided by USB charger                                                                                                  |
| Operating environment temperature and humidity | +5 to +40 °C, 30 to 90% Relative humidity                                                                                                                                              |
| Storage environment temperature and humidity   | -20 to +60 °C, 10 to 95% Relative humidity                                                                                                                                             |
| External dimensions                            | Width 130 to 155 mm x Depth 145 to 170 mm x Hight 36 mm (collapsible)                                                                                                                  |
| Weight                                         | 36 g                                                                                                                                                                                   |
